# Supplementary material
Source: PubMed Central journal article supplement (PMC6998004)
Supplement: INE878551_Supplemental_Material1.pdf [file INE878551_Supplemental_Material1.pdf]

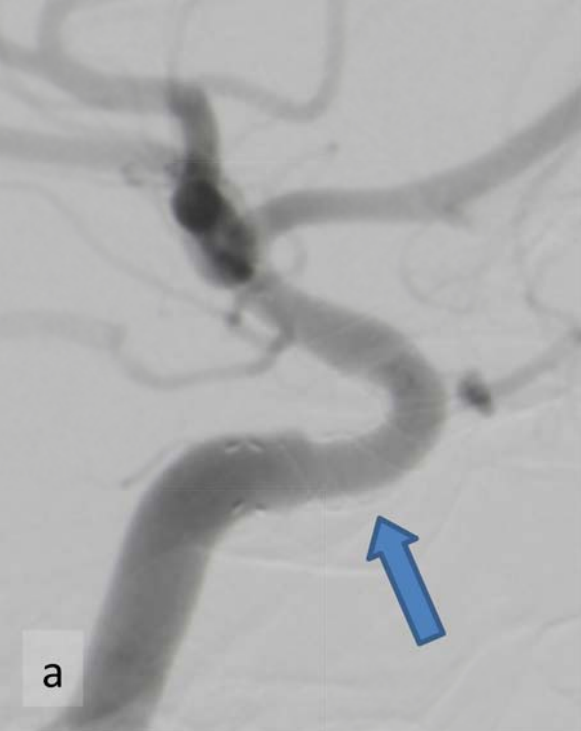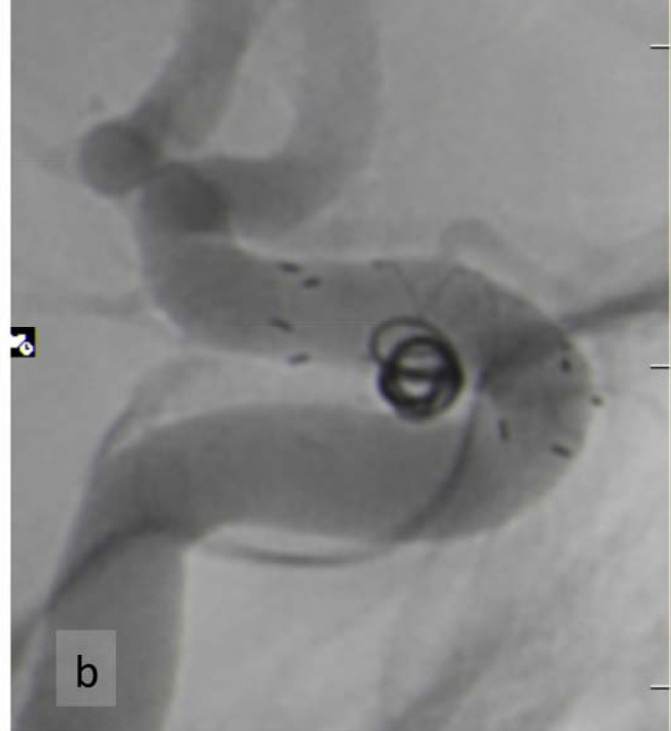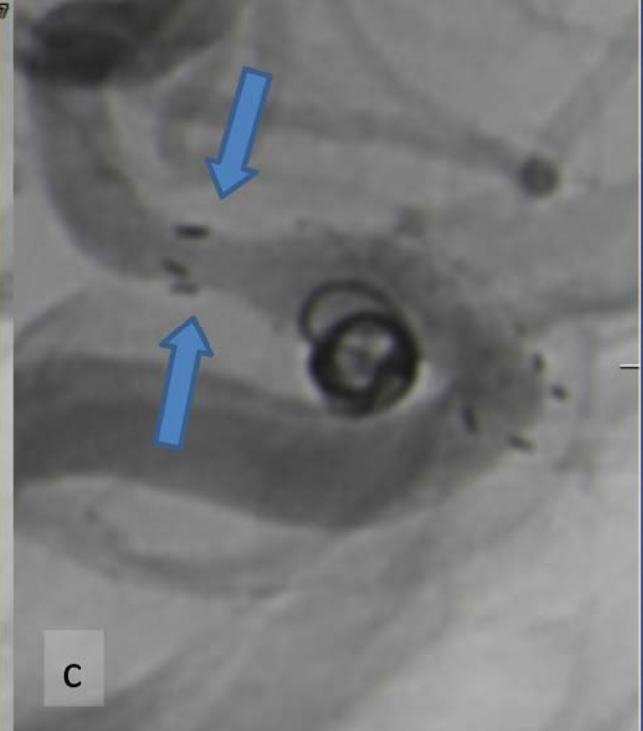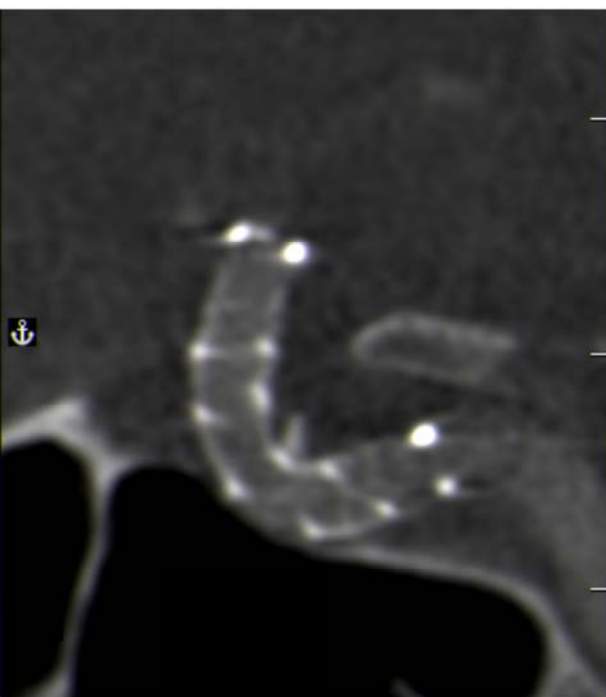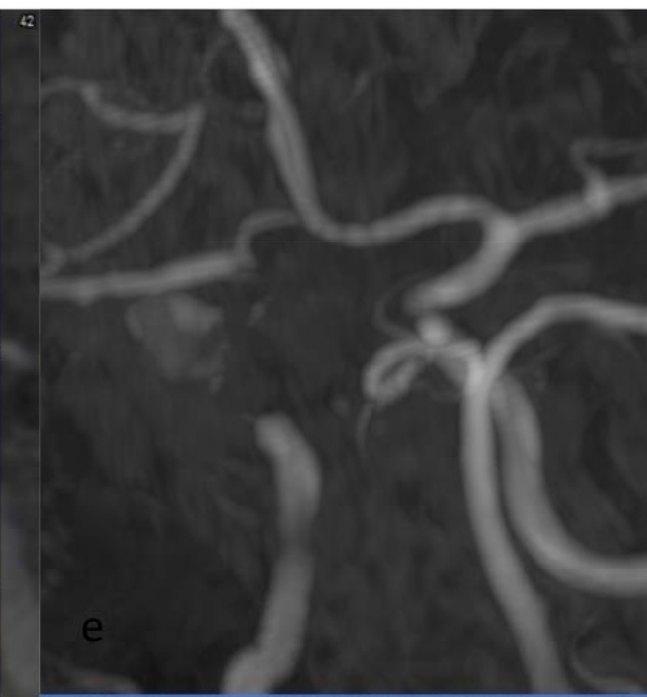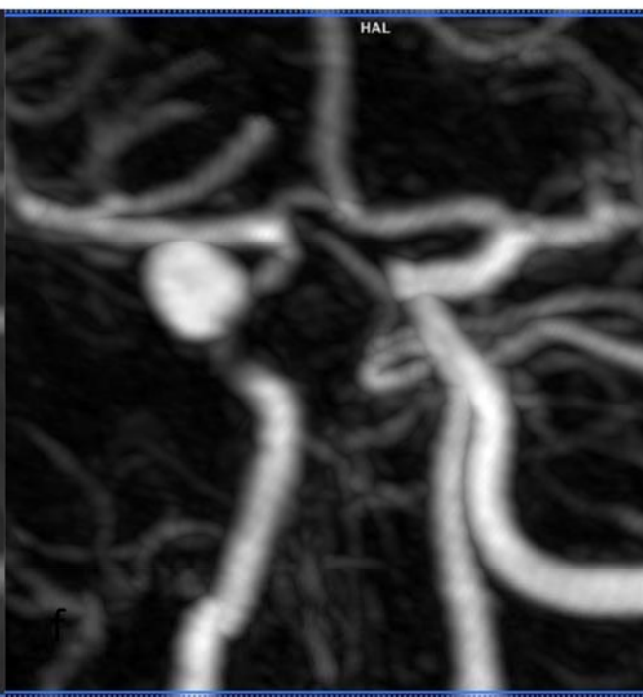

a: example of endothelial thickening

b/c: fish-mouthing phenomenon. b: is taken at the end of intervention whereas c: is from 6 weeks later

d/e/f: example of FD-CT with i.v. contrast application 1 month after intervention. d: note good wall adaption and patency of the FDS. e: artifacts in ToF angiography and in CE angiography (f). Note sufficient aneurysm visualization whereas FDS lumen is obscured.
