# Supplementary material
Source: PubMed Central journal article supplement (PMC6998004)
Supplement: INE878551_Supplemental_Material2.pdf [file INE878551_Supplemental_Material2.pdf]

| Nr | Born       | Treatment  | sex | age | SAH     | pretreatment       | nr of FREDs | coils | localisation | size x | size y | mean |
|----|------------|------------|-----|-----|---------|--------------------|-------------|-------|--------------|--------|--------|------|
| 1  | 9/11/1988  | 1/9/2014   | m   | ##  | no      | no                 | 1           | no    | VA/BA        | 6      | 5      | 5.5  |
| 2  | 6/23/1961  | 2/6/2014   | f   | ##  | other   | coils              | 1           | no    | ICA          | 3      | 3      | 3    |
| 3  | 11/25/1968 | 2/11/2014  | m   | ##  | no      | no                 | 1           | no    | ICA          | 5      | 3      | 4    |
| 4  | 11/24/1967 | 2/25/2014  | f   | ##  | initial | tcoids             | 1           | no    | ICA          | 7      | 4      | 5.5  |
| 5  | 8/30/1946  | 4/7/2014   | f   | ##  | no      | no                 | 1           | no    | VA/BA        | 2      | 2      | 2    |
| 6  | 7/17/1971  | 4/8/2014   | f   | ##  | no      | no                 | 1           | no    | ICA          | 3      | 2      | 2.5  |
| 7  | 1/25/1961  | 4/9/2014   | f   | ##  | no      | non-FRED FDS       | 1           | no    | ICA          | 3      | 2      | 2.5  |
| 8  | 1/30/1962  | 4/10/2014  | f   | ##  | no      | clip               | 1           | no    | ICA          | 3      | 3      | 3    |
| 9  | 8/21/1959  | 4/11/2014  | f   | ##  | no      | coils              | 1           | yes   | ICA          | 5      | 4      | 4.5  |
| 10 | 9/9/1946   | 4/17/2014  | m   | ##  | initial | stent/coils        | 1           | yes   | ICA          | 14     | 11     | 12.5 |
| 11 | 3/11/1937  | 5/21/2014  | f   | ##  | no      | no                 | 2           | no    | ICA          | 11     | 9      | 10   |
| 12 | 10/1/1951  | 6/12/2014  | f   | ##  | no      | no                 | 1           | yes   | VA/BA        | 5      | 3      | 4    |
| 13 | 8/4/1940   | 7/2/2014   | m   | ##  | no      | no                 | 1           | yes   | ICA          | 17     | 17     | 17   |
| 14 | 7/11/1963  | 7/4/2014   | f   | ##  | no      | non-FRED FDS       | 2           | no    | ICA          | 2      | 2      | 2    |
| 15 | 7/26/1937  | 7/15/2014  | f   | ##  | no      | no                 | 1           | yes   | ICA          | 7      | 5      | 6    |
| 16 | 7/30/1946  | 7/24/2014  | f   | ##  | initial | tcoids             | 1           | yes   | ICA          | 9      | 9      | 9    |
| 17 | 6/3/1970   | 7/29/2014  | f   | ##  | no      | no                 | 1           | yes   | ICA          | 6      | 5      | 5.5  |
| 18 | 3/2/1973   | 7/30/2014  | m   | ##  | other   | no                 | 1           | yes   | ICA          | 3      | 3      | 3    |
| 19 | 2/20/1972  | 8/26/2014  | f   | ##  | no      | no                 | 1           | no    | ICA          | 4      | 3      | 3.5  |
| 20 | 8/17/1957  | 9/2/2014   | f   | ##  | no      | no                 | 2           | no    | ICA          | 2      | 1      | 1.5  |
| 21 | 5/8/1938   | 9/11/2014  | f   | ##  | no      | no                 | 1           | no    | ICA          | 5      | 3      | 4    |
| 22 | 8/3/1959   | 9/16/2014  | f   | ##  | other   | no                 | 1           | no    | ICA          | 2      | 1      | 1.5  |
| 23 | 2/3/1956   | 9/17/2014  | f   | ##  | no      | stent/coils        | 1           | no    | ICA          | 12     | 8      | 10   |
| 24 | 4/16/1968  | 9/18/2014  | f   | ##  | no      | no                 | 1           | yes   | ICA          | 10     | 10     | 10   |
| 25 | 2/4/1940   | 9/30/2014  | f   | ##  | no      | no                 | 1           | no    | ICA          | 4      | 3      | 3.5  |
| 26 | 10/17/1941 | 10/7/2014  | f   | ##  | no      | no                 | 1           | no    | ICA          | 2      | 2      | 2    |
| 27 | 2/20/1972  | 10/16/2014 | f   | ##  | no      | no                 | 1           | no    | ICA          | 4      | 4      | 4    |
| 28 | 3/20/1967  | 10/16/2014 | f   | ##  | no      | no                 | 1           | yes   | ICA          | 9      | 4      | 6.5  |
| 29 | 10/20/1963 | 10/21/2014 | f   | ##  | no      | coils              | 1           | no    | VA/BA        | 2      | 1      | 1.5  |
| 30 | 9/28/1971  | 10/23/2014 | m   | ##  | no      | no                 | 1           | no    | ICA          | 2      | 2      | 2    |
| 31 | 11/26/1952 | 10/23/2014 | f   | ##  | initial | stent              | 1           | yes   | ICA          | 3      | 2      | 2.5  |
| 32 | 9/8/1955   | 10/30/2014 | m   | ##  | no      | no                 | 1           | no    | ICA          | 2      | 1      | 1.5  |
| 33 | 5/26/1950  | 11/14/2014 | f   | ##  | no      | no                 | 2           | no    | ICA          | 3      | 3      | 3    |
| 34 | 6/27/1972  | 12/2/2014  | m   | ##  | no      | no                 | 1           | no    | ICA          | 3      | 2      | 2.5  |
| 35 | 3/21/1945  | 12/9/2014  | m   | ##  | no      | no                 | 1           | yes   | ICA          | 19     | 18     | 18.5 |
| 36 | 12/8/1951  | 12/16/2014 | f   | ##  | no      | no                 | 1           | yes   | ICA          | 16     | 14     | 15   |
| 37 | 2/22/1946  | 1/13/2015  | m   | ##  | no      | stent              | 1           | no    | ICA          | 20     | 6      | 13   |
| 38 | 9/21/1944  | 1/15/2015  | f   | ##  | no      | no                 | 1           | no    | ICA          | 2      | 2      | 2    |
| 39 | 10/6/1945  | 1/20/2015  | f   | ##  | no      | no                 | 1           | yes   | ICA          | 6      | 5      | 5.5  |
| 40 | 7/4/1969   | 1/23/2015  | f   | ##  | other   | coils/non-FRED FDS | 1           | yes   | ICA          | 4      | 3      | 3.5  |
| 41 | 6/30/1959  | 1/28/2015  | f   | ##  | no      | no                 | 1           | no    | ICA          | 2      | 1      | 1.5  |
| 42 | 3/28/1953  | 2/10/2015  | f   | ##  | no      | no                 | 1           | yes   | ICA          | 20     | 16     | 18   |
| 43 | 8/16/1960  | 2/26/2015  | f   | ##  | no      | coils              | 1           | yes   | ICA          | 4      | 4      | 4    |
| 44 | 11/8/1961  | 3/24/2015  | f   | ##  | no      | no                 | 1           | yes   | ICA          | 3      | 3      | 3    |
| 45 | 3/30/1959  | 4/23/2015  | f   | ##  | no      | no                 | 1           | no    | ICA          | 4      | 4      | 4    |
| 46 | 9/6/1959   | 5/7/2015   | m   | ##  | no      | no                 | 1           | yes   | ICA          | 6      | 4      | 5    |
| 47 | 12/20/1980 | 5/12/2015  | f   | ##  | no      | no                 | 1           | no    | ICA          | 4      | 3      | 3.5  |
| 48 | 3/15/1974  | 5/26/2015  | f   | ##  | no      | no                 | 1           | no    | ICA          | 2      | 2      | 2    |
| 49 | 1/17/1968  | 5/28/2015  | f   | ##  | no      | no                 | 1           | yes   | ICA          | 8      | 7      | 7.5  |
| 50 | 5/14/1965  | 6/2/2015   | f   | ##  | no      | no                 | 1           | no    | ICA          | 3      | 2      | 2.5  |
| 51 | 1/20/1950  | 6/25/2015  | f   | ##  | other   | stent              | 1           | yes   | ICA          | 3      | 2      | 2.5  |
| 52 | 1/18/1951  | 7/28/2015  | f   | ##  | no      | stent              | 1           | no    | ICA          | 4      | 3      | 3.5  |
| 53 | 1/13/1962  | 8/11/2015  | m   | ##  | no      | no                 | 1           | no    | ICA          | 2      | 2      | 2    |
| 54 | 4/25/1952  | 8/13/2015  | f   | ##  | no      | no                 | 1           | yes   | ICA          | 7      | 5      | 6    |
| 55 | 11/26/1983 | 9/17/2015  | m   | ##  | no      | no                 | 1           | yes   | VA/BA        | 15     | 9      | 12   |
| 56 | 11/15/1944 | 10/22/2015 | f   | ##  | no      | no                 | 1           | no    | ICA          | 4      | 4      | 4    |
| 57 | 6/25/1942  | 11/13/2015 | m   | ##  | no      | no                 | 1           | no    | ICA          | 3      | 2      | 2.5  |
| 58 | 4/4/1951   | 11/17/2015 | f   | ##  | no      | no                 | 1           | no    | ICA          | 4.5    | 2.5    | 3.5  |
| 59 | 1/2/1991   | 11/19/2015 | m   | ##  | other   | no                 | 1           | yes   | ICA          | 7      | 6      | 6.5  |
| 60 | 10/19/1970 | 12/1/2015  | m   | ##  | no      | coils              | 1           | yes   | ICA          | 5      | 5      | 5    |
| 61 | 11/13/1964 | 11/30/2015 | f   | ##  | no      | no                 | 1           | no    | ICA          | 2      | 2      | 2    |
| 62 | 11/13/1964 | 1/8/2016   | f   | ##  | no      | no                 | 1           | no    | ICA          | 2      | 2      | 2    |
| 63 | 4/29/1952  | 1/20/2016  | f   | ##  | no      | no                 | 1           | no    | ICA          | 3      | 2      | 2.5  |
| 64 | 5/21/1967  | 2/26/2016  | f   | ##  | no      | no                 | 1           | yes   | ICA          | 7      | 11     | 9    |
| 65 | 6/17/1978  | 3/11/2016  | f   | ##  | no      | no                 | 1           | yes   | ICA          | 5.5    | 5      | 5.25 |
| 66 | 8/21/1948  | 3/11/2016  | f   | ##  | no      | no                 | 1           | yes   | ICA          | 5      | 7      | 6    |
| 67 | 1/26/1955  | 3/23/2016  | f   | ##  | no      | no                 | 1           | no    | ICA          | 6      | 7      | 6.5  |
| 68 | 6/15/1951  | 4/22/2016  | f   | ##  | no      | no                 | 1           | no    | ICA          | 2      | 3      | 2.5  |
| 69 | 6/15/1951  | 4/22/2016  | f   | ##  | no      | no                 | 1           | yes   | ICA          | 9      | 5      | 7    |
| 70 | 6/15/1949  | 5/4/2016   | f   | ##  | no      | no                 | 1           | no    | VA/BA        | 3      | 2      | 2.5  |
| 71 | 1/28/1965  | 5/18/2016  | f   | ##  | no      | no                 | 1           | yes   | ICA          | 4      | 4      | 4    |
| 72 | 1/28/1965  | 5/18/2016  | f   | ##  | no      | no                 | 1           | no    | ICA          | 2      | 2      | 2    |
| 73 | 1/14/1957  | 6/1/2016   | f   | ##  | no      | no                 | 1           | yes   | VA/BA        | 8      | 7      | 7.5  |
| 74 | 3/9/1958   | 6/8/2016   | f   | ##  | no      | stent              | 1           | no    | ICA          | 5      | 8      | 6.5  |
| 75 | 4/9/1962   | 6/10/2016  | f   | ##  | no      | no                 | 1           | no    | ICA          | 2      | 2      | 2    |
| 76 | 6/28/1940  | 4/27/2016  | f   | ##  | no      | no                 | 1           | no    | ICA          | 3      | 2      | 2.5  |
| 77 | 6/28/1940  | 6/17/2016  | f   | ##  | no      | no                 | 1           | no    | ICA          | 3      | 2      | 2.5  |
| 78 | 12/27/1958 | 6/17/2016  | f   | ##  | no      | no                 | 1           | yes   | ICA          | 8      | 5      | 6.5  |
